# Supplementary material for: DLST-dependence dictates metabolic heterogeneity in TCA-cycle usage among triple-negative breast cancer
Source: PubMed Central journal article supplement (PMC8595664; doi:10.1038/s42003-021-02805-8), 2021-11-16
Supplement: 42003_2021_2805_MOESM1_ESM.pdf [file 42003_2021_2805_MOESM1_ESM.pdf]

## 1 **Supplementary Information**

### 2 **Supplementary Methods**

#### 3 **Patient sample analysis**

4 *In silico* Kaplan-Meier analysis was performed to determine the association of *DLD* or  
5 *OGDH* expression with the overall and recurrence-free survival of breast cancer patients using the  
6 online tool and database (<http://kmplot.com/analysis/>)<sup>1</sup>. We applied array and  
7 immunohistochemistry (IHC) for ER, IHC for PR, and array for HER2 to stratify patients with the  
8 best cut-off for gene-of-interest expression, which provides the optimal curve segregation. To  
9 further verify the findings, we re-analyzed the publicly available dataset (GSE2034) from  
10 NCBI/Genbank GEO database<sup>2</sup>. We also applied the best cut-off and receptor expression (ER <  
11 1000, PR < 20, and HER2 < 3700 as being negative) to categorize patient samples into three  
12 categories: ER+ (n=200), ER- (n=86), and TNBC (n=41). Cox regression analysis was utilized to  
13 determine the association of *DLST*, *DLD*, or *OGDH* expression with recurrence-free survival  
14 among breast cancer patients.

15 To compare *DLST* expression in normal tissues to different types of breast cancer patient  
16 samples, we obtained the dataset through the cBioPortal website  
17 (<https://www.cbioportal.org/datasets>)<sup>3</sup>, and reanalyzed using *R studio* (3.5.3). There is a total of  
18 2506 breast cancer samples, 1459 ER+, 444 ER-, and 217 TNBC with mRNA expression data.  
19 *DLST* mRNA expression is expressed as z-scores (relative to normal expression) from Illumina  
20 Human v3 microarray. Mean and standard deviation of expression z-scores and number of samples  
21 were used from three groups of patients to perform one-way ANOVA test.

22 To determine *DLST* protein expression among patient samples of different subtypes of  
23 breast cancer, we re-analyzed publicly available proteomics data<sup>4</sup>. There is a total of 122 breast

24 cancer samples: 82 for ER+; 39 for ER-; and 16 for TNBC. The protein expression is presented as  
25 z-scores (relative to normal expression). Mean and standard deviation of expression z-scores and  
26 number of samples were used from three groups of patients to perform one-way ANOVA test.

27

### 28 **Galactose replacement assay**

29 TNBC cells at the exponential growth phase were trypsinized, washed twice with DPBS,  
30 and resuspended in glucose-free DMEM or RPMI-1640 medium (11966025 or 11879020, Gibco),  
31 supplemented with 10% dialyzed FBS (26400044, Gibco) together with either 10 mM glucose or  
32 galactose (G8270 or G5388, Sigma). After cell density was adjusted to  $30,000 \text{ ml}^{-1}$ , 100  $\mu\text{l}$  of cell  
33 mixture was seeded into a 96-well plate in triplicates. ATP contents were measured using the  
34 CellTiter-Glo kit (G9242, Promega) after 0, 2, 6, and 24 hours (h). Data were presented as the  
35 relative percentage of intracellular ATP contents normalized to the mean value in cells exposed to  
36 glucose at 0 h.

37

### 38 **Mitochondrial bioenergetics profiling**

39 Oxygen consumption rates (OCR) were measured using the XF96 Extracellular Flux  
40 analyzer (Seahorse Bioscience) as described<sup>5</sup>. Specifically, Hs578T and BT-549 cells were plated  
41 at a density of 10,000 or 18,000 cells per well on an XF96 plate, respectively. Cells were then  
42 incubated for 24 h in a humidified 37 °C incubator with 5% CO<sub>2</sub> in DMEM or RPMI medium.  
43 While sensor cartridges were calibrated, cell plates were rinsed and cultured in a commercial assay  
44 medium supplemented with 2 mM L-glutamine and then incubated in a 37°C non-CO<sub>2</sub> incubator  
45 for 1 h before the measurement. OCR was measured first under basal conditions, then in the  
46 presence of a complex V inhibitor oligomycin (2.5  $\mu\text{M}$ , Sigma) to define ATP-coupled respiration,

47 or mitochondrial uncoupler FCCP (0.5  $\mu$ M, Sigma) to assess maximal oxidative capacity, finally  
48 the combination of complex I inhibitor rotenone (2  $\mu$ M, Sigma) and complex III inhibitor  
49 antimycin A (2  $\mu$ M, Sigma) to eliminate mitochondrial respiration. Three measurements of OCR  
50 were obtained following the injection of each drug after optimization of conditions for each cell  
51 line. Total cell numbers in each well were determined by imaging the plate in a celigo imager and  
52 counting the cells under the brightfield fields.

53

#### 54 **Glutamine withdrawal and growth rescue with cycle intermediates**

55  $3 \times 10^3$  TNBC cells were seeded into each well of a 96-well plate in triplicates in glutamine-  
56 free DMEM or RPMI-1640 medium (10313021 or 42401018, Gibco), which is supplemented with  
57 10% dialyzed FBS (26400044, Gibco), with or without 2 mM glutamine (G8540, Sigma). For the  
58 rescue experiment, 2 mM dimethyl 2-oxoglutarate (349631, Sigma) or mono-methyl hydrogen  
59 succinate (M81101, Sigma) were added into the wells with cells cultured without glutamine. At  
60 48 h post treatment, cell viability were measured using the CellTiter-Blue® Cell Viability Assay  
61 reagent (G8080, Promega) following the manufacture's instruction. Data were normalized to the  
62 control cells with 2 mM glutamine in their media.

63

#### 64 **Quantitative real-time PCR (qRT-PCR)**

65 Breast cancer cells and non-transformed MCF10A cells were cultured, harvested, and  
66 subjected to total RNA extraction using Trizol reagent (15596026, Invitrogen). cDNA was  
67 synthesized with a Reverse Transcription Kit (205311, Qiagen). SYBR Green PCR master mix  
68 (QP004, Genecopoeia) and a Step-One PCR instrument (Applied Biosystems) were utilized for  
69 the qRT-PCR reaction according to the manufacturer's instruction. The qRT-PCR primer

70 sequences include: *DLST*, forward 5'-GGTGGGAGAAAGCTGTTGGAGAC-3' and reverse 5'-  
71 GTGGAGTGCCTCCTTCGACTTTT-3';  $\beta$ -ACTIN, forward 5'-  
72 GGATTCCTATGTGGGCGACG-3' and reverse 5'- ACATGATCTGGGTCATCTTCTCG-3'.

73 All reactions were performed in triplicates.

74

### 75 **Statistics and reproducibility**

76 The association of *DLD* or *OGDH* expression with overall and recurrence-free survival  
77 among patients with different subtypes of breast cancer was assessed by Kaplan-Meier analysis.  
78 The comparison of the statistical difference between the survival curves was done with the log-  
79 rank test. The student's *t*-test was used to analyze differences in *DLST* protein and mRNA  
80 expression, ATP contents, metabolites, and isotope-labeled glutamine contribution to metabolic  
81 derivatives for TNBC cells with control vs. *DLST* knockdown. One-way analysis of variance  
82 (ANOVA) was utilized to assess differences in cell growth rates among TNBC cells in the presence  
83 or absence of *DLST* knockdown. All experiments except re-analysis of the publicly available  
84 datasets were conducted at least three times independently. *P* values equal to or less than 0.05 were  
85 considered statistically significant without adjusted for multiple comparisons.

86 **Figure Legends**

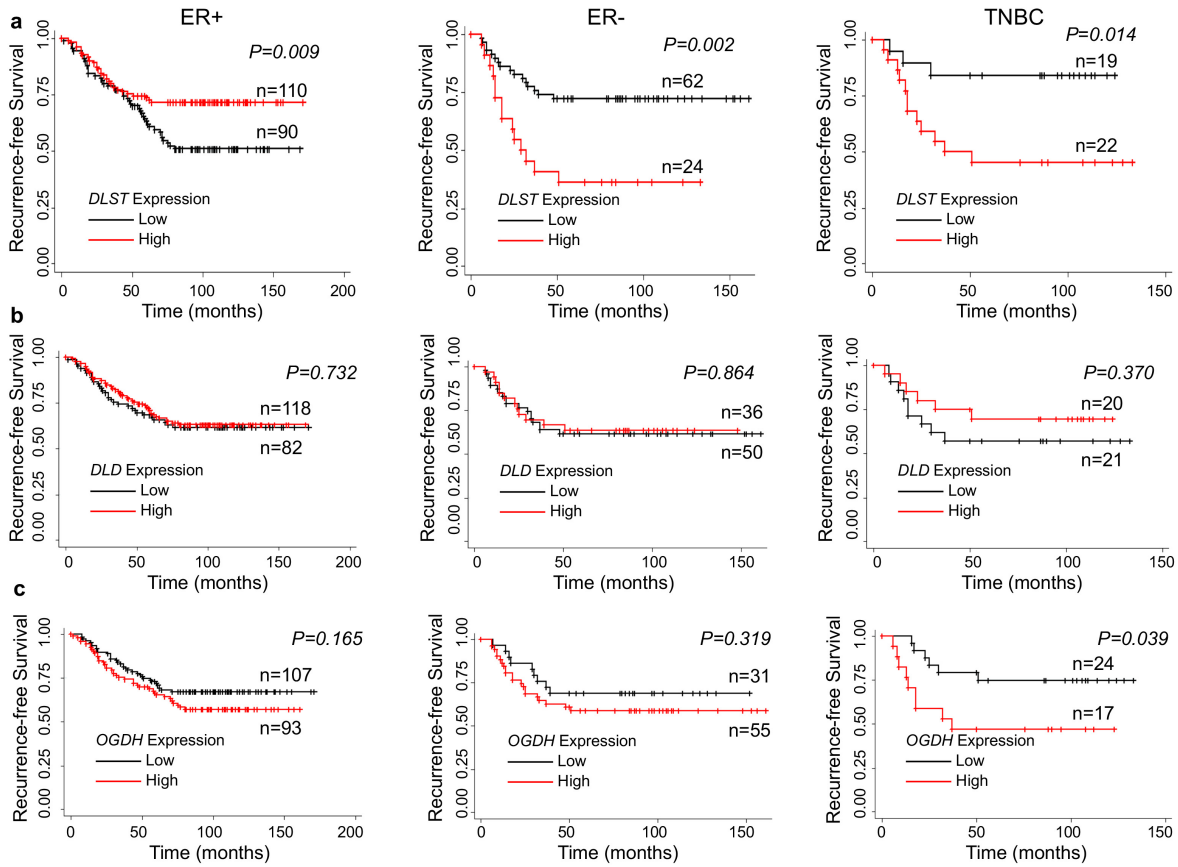

87

88 **Supplementary Figure 1 | High DLST expression is associated with poor recurrence-free**

89 **survival in TNBC patients. a-c, Kaplan-Meier re-analysis of published data for the association**

90 **of DLST (a), DLD (b), and OGDH (c) expression with recurrence-free survival among breast**

91 **cancer patients (GSE2034)<sup>1</sup>: ER+ breast cancer (n = 200), ER- breast cancer (n = 86), and TNBC**

92 **(n = 41). The overall survival data is not available for this database. Patient samples were stratified**

93 **using the best cut-off and compared with the log-rank test for statistical significance between**

94 **curves.**

95

96

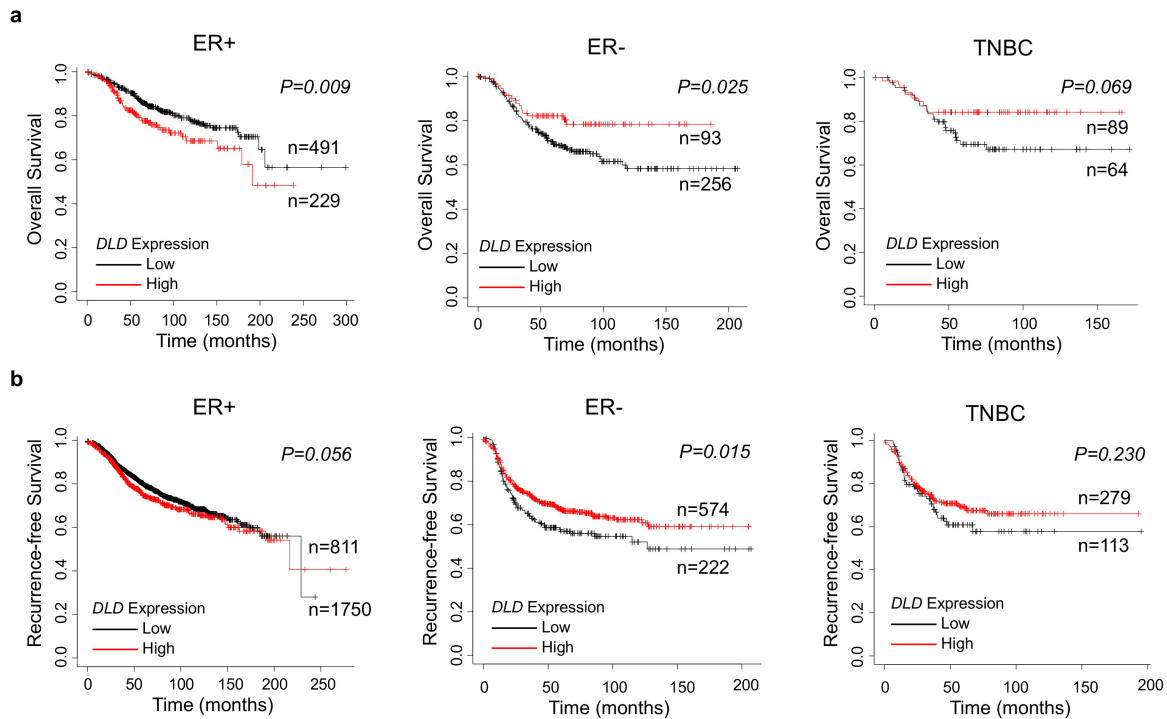

97

98 **Supplementary Figure 2 | DLD expression does not predict overall or recurrence-free**

99 **survival among TNBC patients. a-b**, *in silico* Kaplan-Meier analysis of the association between

100 *DLD* expression and overall (a) as well as recurrence-free (b) survival of breast cancer patients

101 using an online tool (<http://kmplot.com/analysis/>). Overall survival:  $n = 720$  for ER+,  $n = 349$  for

102 ER-, and  $n = 153$  for TNBC; and recurrence-free survival:  $n = 2561$  for ER+,  $n = 796$  for ER-, and

103  $n = 392$  for TNBC. Patient samples were stratified using the best cut-off and compared with the

104 log-rank test for statistical significance between curves.

105

106

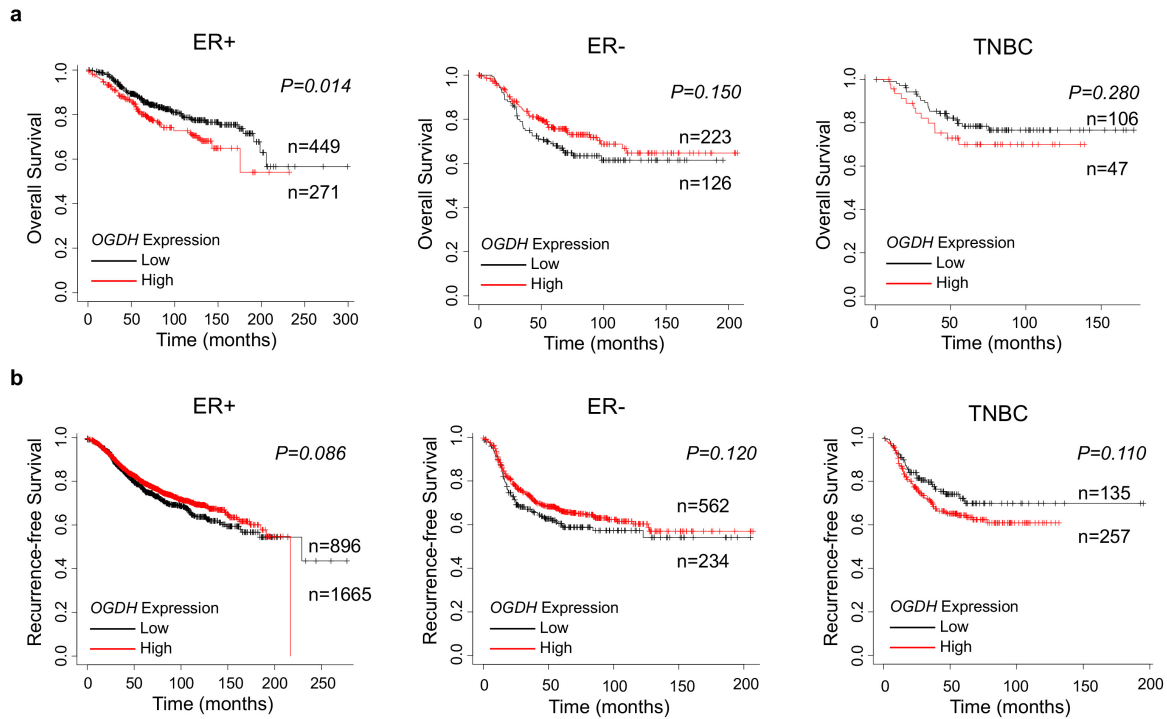

107

108 **Supplementary Figure 3 | *OGDH* expression does not predict overall or recurrence-free**

109 **survival among TNBC patients. a-b, *in silico* Kaplan-Meier analysis of the association between**

110 ***OGDH* expression and overall (a) as well as recurrence-free (b) survival of breast cancer patients**

111 **using an online tool (<http://kmplot.com/analysis/>).** Overall survival:  $n = 720$  for ER+,  $n = 349$  for

112 **ER-, and  $n = 153$  for TNBC; and recurrence-free survival:  $n = 2561$  for ER+,  $n = 796$  for ER-, and**

113  **$n = 392$  for TNBC. Patient samples were stratified using the best cut-off and compared with the**

114 **log-rank test for statistical significance between curves.**

115

116

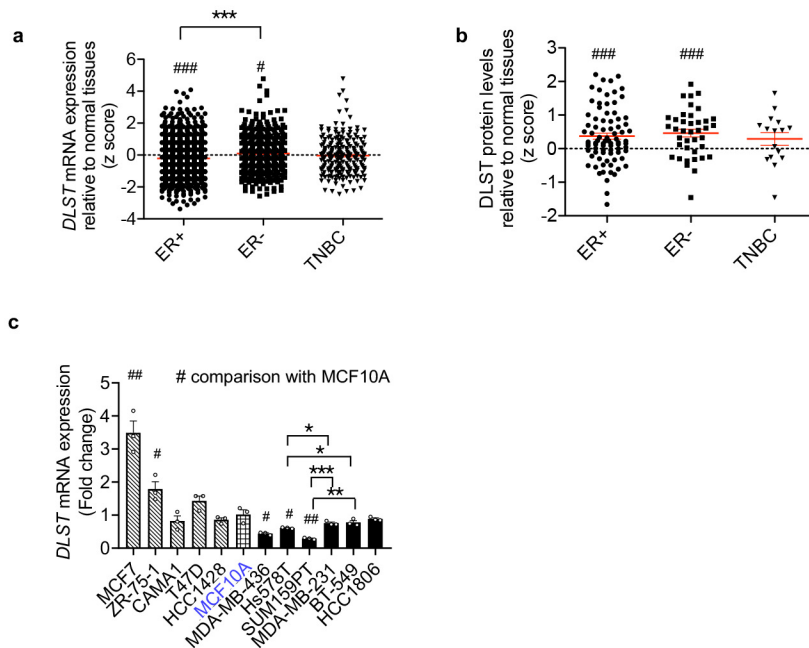

117

118 **Supplementary Figure 4 | DLST levels in breast cancer patient samples and cell lines. a,**

119 *DLST* transcript levels in ER+, ER- and TNBC patient samples relative to normal tissues (data re-

120 analyzed from a database through the cBioPortal website<sup>3</sup>). **b**, DLST protein levels in ER+, ER-

121 and TNBC patient samples relative to normal tissues (data re-analyzed from a publicly available

122 database<sup>4</sup>). **c**, *DLST* transcript levels in five human ER+ cell lines (HCC1428, T47D, CAMA-1,

123 ZR-75-1, and MCF7: dashed bars), a non-transformed mammary gland MCF10A cell line (boxed

124 bar), and six human TNBC cell lines (HCC1806, BT-549, MDA-MB-231, SUM159T, Hs578T,

125 and MDA-MB-436: solid black bars). Although *DLST* mRNA expression appeared to be higher in

126 our ER+ breast cancer cell lines than that in patient samples, this is likely due to the lack of data

127 representation from the very limited number of cell lines. # indicates the significant difference

128 among different subtypes of breast cancer patient samples or between breast cancer cell lines when

129 compared to MCF10A cells. One-way ANOVA was used for statistical analyses in (**a-c**). \* or #  $P$

130  $\leq 0.05$ , \*\* or ##  $P \leq 0.01$ , \*\*\*  $P \leq 0.001$ .



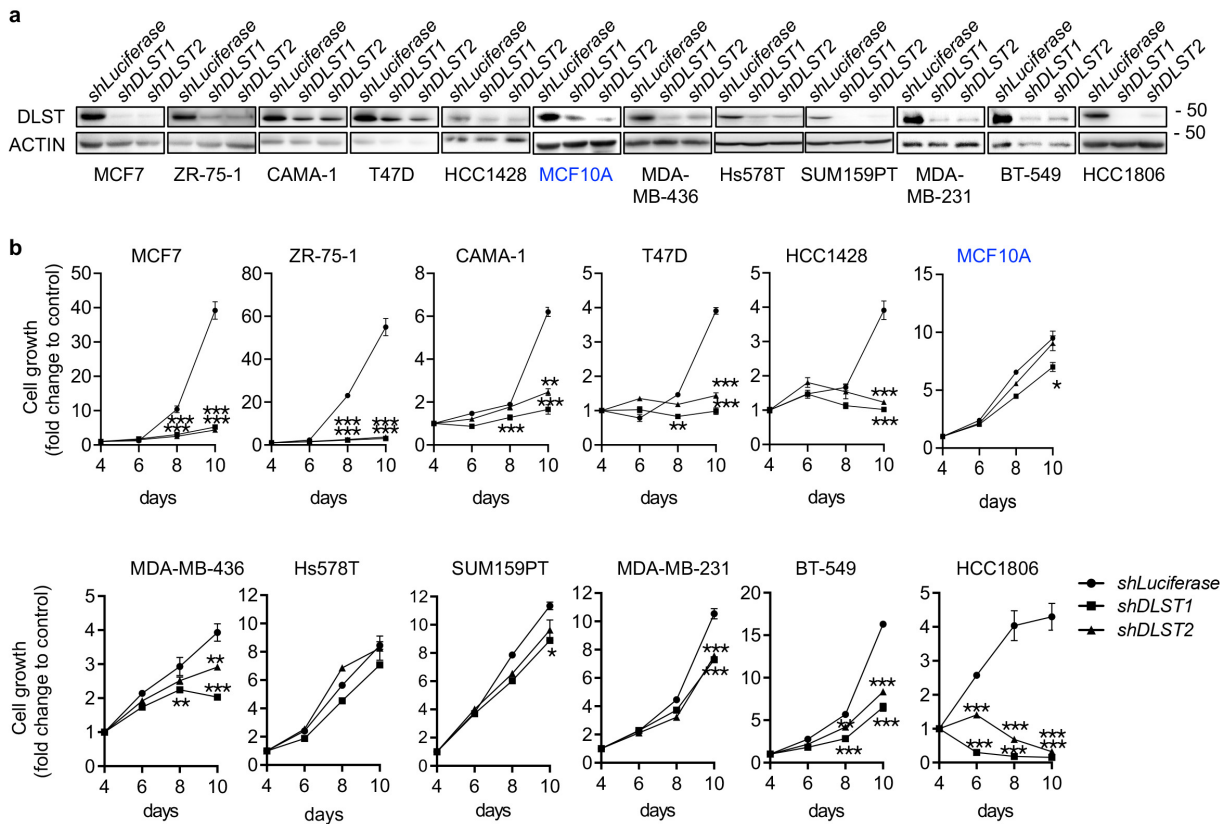

131

132 **Supplementary Figure 5 | *DLST* inactivation differentially impacts the growth of breast**

133 **cancer cell lines. a**, Western blotting analysis of *DLST* protein levels at day 4 post-transduction

134 **of *shLuciferase*, *shDLST1*, or *shDLST2* hairpin in ER+, non-transformed MCF10A, and TNBC**

135 **cell lines. b**, Relative cell growth curve for each cell line upon *DLST* inactivation. Representative

136 **data from three independent experiments are presented as mean ± s.e.m in (a-b). \*  $P \leq 0.05$ , \*\*  $P$**

137  **$\leq 0.01$ , \*\*\*  $P \leq 0.001$ .**

138

139

140

141

142

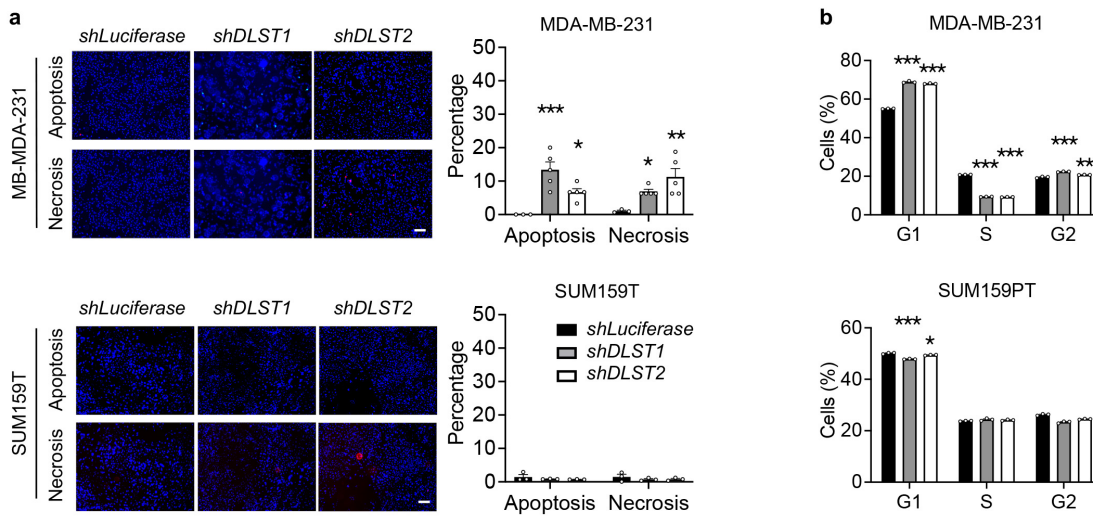

143

144 **Supplementary Figure 6 | Human TNBC cell lines exhibit different dependence on DLST. a,**

145 Apoptosis and necrosis of TNBC cells were assessed at day 5 post-transduction by Annexin-V

146 (green) and Ethidium homodimer III (red) staining, respectively, with DAPI (blue) staining for all

147 cells. Representative images of MDA-MB-231 and SUM159PT cells (left) together with their

148 quantification (right) were shown (n = 6 per group). Scale bars = 20  $\mu$ m. **b,** Cell cycle distribution

149 of MDA-MB-231 and SUM159PT cells after *DLST* knockdown was shown as the percentage of

150 cells in each cell-cycle phase (n = 3 biological samples). Data in **(a,b)** are presented as mean  $\pm$

151 s.e.m. One-way analysis of variance (ANOVA) in **(a)** and an unpaired two-tailed *t*-test in **(b)** were

152 used for statistical analyses. \*  $\leq 0.05$ , \*\*  $P \leq 0.01$ , \*\*\*  $P \leq 0.001$ .

153

154

155  
156  
157  
158  
159  
160  
161  
162  
163  
164  
165  
166  
167  
168  
169  
170  
171  
172  
173  
174  
175  
176  
177

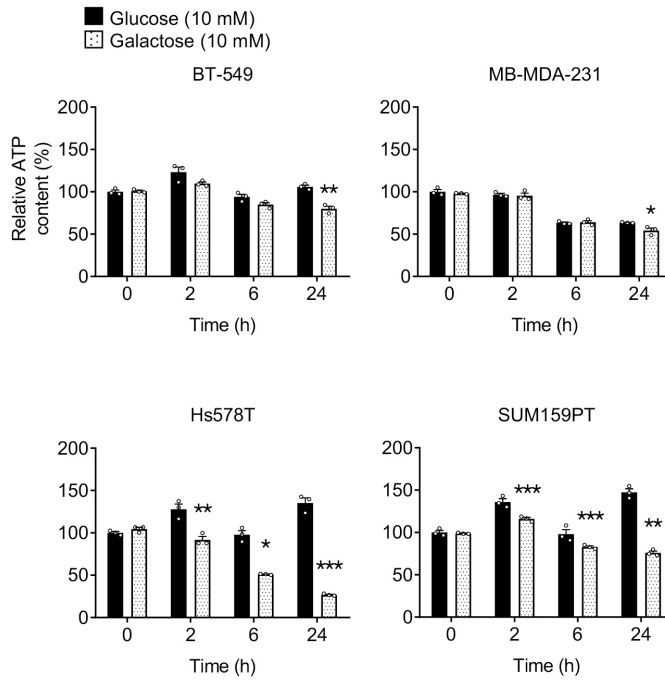

**Supplementary Figure 7 | Human TNBC cell lines exhibit different capabilities in utilizing the TCA cycle.** Relative ATP contents in BT-549, MDA-MB-231, Hs578T, and SUM159PT cells are shown at indicated time points in the presence of 10 mM glucose or galactose (n = 3). Representative data from three independent experiments are presented as mean ± s.e.m, with an unpaired two-tailed *t*-test to calculate statistical significance. \*  $P \leq 0.05$ , \*\*  $P \leq 0.01$ , \*\*\*  $P \leq 0.001$ .

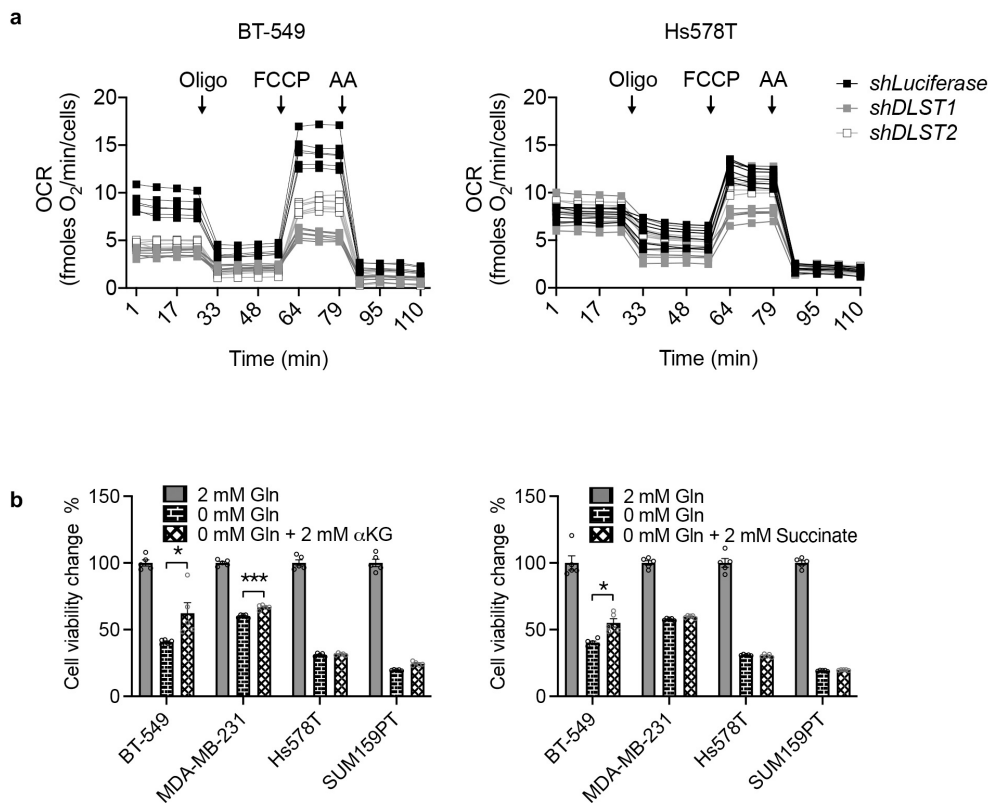

178

179 **Supplementary Figure 8 | Differential usage of the TCA cycle and glutamine anaplerosis in**

180 **human TNBC cells. a**, Different types of OCR in BT-549 and Hs578T cells after *DLST*

181 knockdown (n = 6), following the addition of oligomycin (Oligo, 2.5 μM), the uncoupler FCCP

182 (0.5 μM), or the electron transport inhibitor rotenone and antimycin A (AA, 2 μM). **b**, Exogenous

183 supplement of succinate and α-ketoglutarate can partially rescue the growth of DLST-dependent

184 TNBC cells (BT-549 and MDA-MB-231) but not the independent ones (SUM159PT and Hs578T)

185 upon glutamine withdrawal. Representative data from three independent experiments are presented

186 as mean ± s.e.m, with a One-way ANOVA used for statistical analyses to calculate statistical

187 significance. \*  $P \leq 0.05$ , \*\*  $P \leq 0.01$ , \*\*\*  $P \leq 0.001$ .

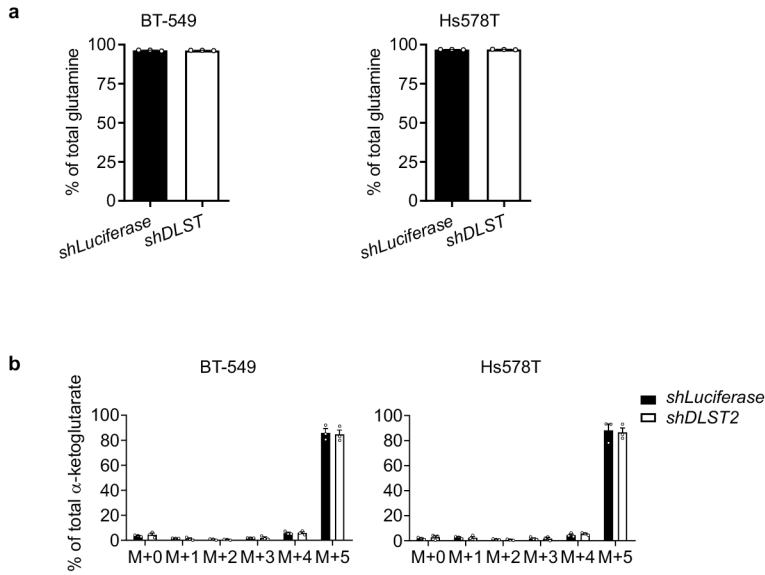

188

189 **Supplementary Figure 9 |  $^{13}\text{C}$  labeled glutamine is efficiently incorporated into TNBC cells.**

190 **a-b**, Percentage of  $^{13}\text{C}$  labeled glutamine (**a**) or  $\alpha$ -ketoglutarate (**b**) incorporated into BT-549 and

191 Hs578T cells in the presence or absence of *DLST* knockdown ( $n = 3$ ). Data are presented as mean

192  $\pm$  s.e.m, and an unpaired two-tailed *t*-test was used to calculate statistical significance.

193

194

195

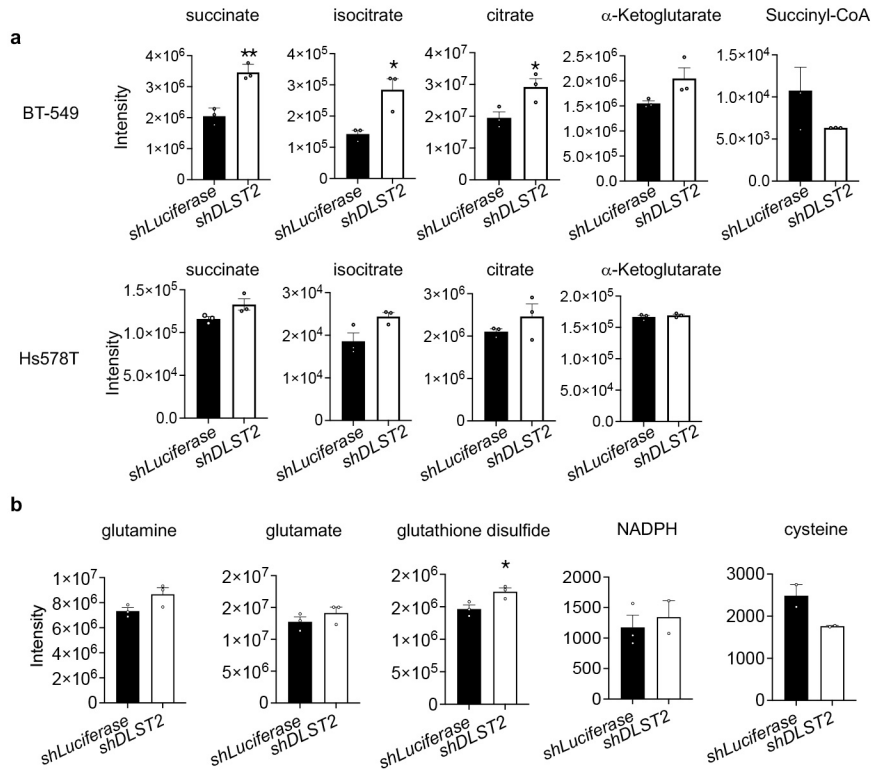

196

197 **Supplementary Figure 10 | DLST depletion significantly alters metabolite levels in BT-549**

198 **but minimally in Hs578T cells. a**, Changes of TCA-cycle metabolites – succinate, isocitrate,

199 citrate, α-ketoglutarate, and succinyl-CoA – in BT-549 and Hs578T cells (n = 3). Succinyl-CoA

200 was undetectable in Hs578T cells. **b**, Changes of glutamine, glutamate, glutathione disulfide,

201 NADPH, and cysteine in Hs578T cells after *DLST* knockdown (n = 3). Cystine was undetectable.

202 Data in (a-b) are presented as mean ± s.e.m, and an unpaired two-tailed *t*-test was used to calculate

203 statistical significance. \**P* ≤ 0.05, \*\* *P* ≤ 0.01.

204

205

206

207 **Supplementary References**

- 208 1 Gyorffy, B. *et al.* An online survival analysis tool to rapidly assess the effect of 22,277 genes  
209 on breast cancer prognosis using microarray data of 1,809 patients. *Breast cancer research*  
210 *and treatment* **123**, 725-731, doi:10.1007/s10549-009-0674-9 (2010).
- 211 2 Wang, Y. *et al.* Gene-expression profiles to predict distant metastasis of lymph-node-  
212 negative primary breast cancer. *Lancet (London, England)* **365**, 671-679,  
213 doi:10.1016/s0140-6736(05)17947-1 (2005).
- 214 3 Pereira, B. *et al.* The somatic mutation profiles of 2,433 breast cancers refines their genomic  
215 and transcriptomic landscapes. *Nat Commun* **7**, 11479, doi:10.1038/ncomms11479 (2016).
- 216 4 Krug, K. *et al.* Proteogenomic Landscape of Breast Cancer Tumorigenesis and Targeted  
217 Therapy. *Cell* **183**, 1436-1456 e1431, doi:10.1016/j.cell.2020.10.036 (2020).
- 218 5 Wu, M. *et al.* Multiparameter metabolic analysis reveals a close link between attenuated  
219 mitochondrial bioenergetic function and enhanced glycolysis dependency in human tumor  
220 cells. *American Journal of Physiology-Cell Physiology* **292**, C125-C136,  
221 doi:10.1152/ajpcell.00247.2006 (2007).

222
