# Supplementary material for: DLST-dependence dictates metabolic heterogeneity in TCA-cycle usage among triple-negative breast cancer
Source: PubMed Central journal article supplement (PMC8595664; doi:10.1038/s42003-021-02805-8), 2021-11-16
Supplement: 42003_2021_2805_MOESM2_ESM.pdf [file 42003_2021_2805_MOESM2_ESM.pdf]

## Description of Additional Supplementary Files

**File name:** Supplementary Data

**Description:** Source data for graphs and charts generated for the main figures and supplementary figures.
