# Supplementary material for: DLST-dependence dictates metabolic heterogeneity in TCA-cycle usage among triple-negative breast cancer
Source: PubMed Central journal article supplement (PMC8595664; doi:10.1038/s42003-021-02805-8), 2021-11-16
Supplement: 42003_2021_2805_MOESM4_ESM.pdf [file 42003_2021_2805_MOESM4_ESM.pdf]

## Reporting Summary

Nature Research wishes to improve the reproducibility of the work that we publish. This form provides structure for consistency and transparency in reporting. For further information on Nature Research policies, see our [Editorial Policies](#) and the [Editorial Policy Checklist](#).

### Statistics

For all statistical analyses, confirm that the following items are present in the figure legend, table legend, main text, or Methods section.

n/a Confirmed

- The exact sample size ( $n$ ) for each experimental group/condition, given as a discrete number and unit of measurement
- A statement on whether measurements were taken from distinct samples or whether the same sample was measured repeatedly
- The statistical test(s) used AND whether they are one- or two-sided  
*Only common tests should be described solely by name; describe more complex techniques in the Methods section.*
- A description of all covariates tested
- A description of any assumptions or corrections, such as tests of normality and adjustment for multiple comparisons
- A full description of the statistical parameters including central tendency (e.g. means) or other basic estimates (e.g. regression coefficient) AND variation (e.g. standard deviation) or associated estimates of uncertainty (e.g. confidence intervals)
- For null hypothesis testing, the test statistic (e.g.  $F$ ,  $t$ ,  $r$ ) with confidence intervals, effect sizes, degrees of freedom and  $P$  value noted  
*Give  $P$  values as exact values whenever suitable.*
- For Bayesian analysis, information on the choice of priors and Markov chain Monte Carlo settings
- For hierarchical and complex designs, identification of the appropriate level for tests and full reporting of outcomes
- Estimates of effect sizes (e.g. Cohen's  $d$ , Pearson's  $r$ ), indicating how they were calculated

*Our web collection on [statistics for biologists](#) contains articles on many of the points above.*

### Software and code

Policy information about [availability of computer code](#)

Data collection

G: BOX Chemi XT4 (Syngene), BD LSRII SORP (BD Biosciences), LC-MS at Beth Israel Deaconess Medical Center, XF96 Extracellular Flux analyzer (Seahorse Bioscience), microplate reader (BMG LABTECH), Revolve microscope (ECHO), Step-One PCR instrument (Applied Biosystems)

Data analysis

ModFit LT software (Verify Software House), R v3.5.3., MetaboAnalyst 4.0 (<https://www.metaboanalyst.ca/>), Image J (Fiji), Microsoft Excel (Excel 365), and GraphPad Prism (v8.0)

For manuscripts utilizing custom algorithms or software that are central to the research but not yet described in published literature, software must be made available to editors and reviewers. We strongly encourage code deposition in a community repository (e.g. GitHub). See the Nature Research [guidelines for submitting code & software](#) for further information.

### Data

Policy information about [availability of data](#)

All manuscripts must include a [data availability statement](#). This statement should provide the following information, where applicable:

- Accession codes, unique identifiers, or web links for publicly available datasets
- A list of figures that have associated raw data
- A description of any restrictions on data availability

Data supporting the findings of this study are described in the article. The raw data are available from the corresponding author upon request.

## Field-specific reporting

Please select the one below that is the best fit for your research. If you are not sure, read the appropriate sections before making your selection.

Life sciences       Behavioural & social sciences       Ecological, evolutionary & environmental sciences

For a reference copy of the document with all sections, see [nature.com/documents/nr-reporting-summary-flat.pdf](https://www.nature.com/documents/nr-reporting-summary-flat.pdf)

## Life sciences study design

All studies must disclose on these points even when the disclosure is negative.

|                 |                                                                             |
|-----------------|-----------------------------------------------------------------------------|
| Sample size     | NO sample size calculation was performed.                                   |
| Data exclusions | No data were excluded.                                                      |
| Replication     | Three independent replicates were performed for all studies.                |
| Randomization   | The xenograft fish were randomly allocate into groups before the treatment. |
| Blinding        | Not relative to this study.                                                 |

## Reporting for specific materials, systems and methods

We require information from authors about some types of materials, experimental systems and methods used in many studies. Here, indicate whether each material, system or method listed is relevant to your study. If you are not sure if a list item applies to your research, read the appropriate section before selecting a response.

### Materials & experimental systems

| n/a                                 | Involvement in the study                                        |
|-------------------------------------|-----------------------------------------------------------------|
| <input type="checkbox"/>            | <input checked="" type="checkbox"/> Antibodies                  |
| <input type="checkbox"/>            | <input checked="" type="checkbox"/> Eukaryotic cell lines       |
| <input checked="" type="checkbox"/> | <input type="checkbox"/> Palaeontology and archaeology          |
| <input type="checkbox"/>            | <input checked="" type="checkbox"/> Animals and other organisms |
| <input checked="" type="checkbox"/> | <input type="checkbox"/> Human research participants            |
| <input checked="" type="checkbox"/> | <input type="checkbox"/> Clinical data                          |
| <input checked="" type="checkbox"/> | <input type="checkbox"/> Dual use research of concern           |

### Methods

| n/a                                 | Involvement in the study                           |
|-------------------------------------|----------------------------------------------------|
| <input checked="" type="checkbox"/> | <input type="checkbox"/> ChIP-seq                  |
| <input type="checkbox"/>            | <input checked="" type="checkbox"/> Flow cytometry |
| <input checked="" type="checkbox"/> | <input type="checkbox"/> MRI-based neuroimaging    |

## Antibodies

|                 |                                                                                                                                                                                                                                               |
|-----------------|-----------------------------------------------------------------------------------------------------------------------------------------------------------------------------------------------------------------------------------------------|
| Antibodies used | Primary antibodies used include anti-DLST (H00001743, Abnova) and anti-ACTIN (sc-47778, Santa Cruz Biotechnology). Secondary antibodies include anti-mouse (31430, Thermo Scientific) or anti-rabbit antibodies (65-6120, Thermo Scientific). |
| Validation      | Validations of antibodies were done by the indicated manufacturer and supported by the publications listed in the manufacturer's websites.                                                                                                    |

## Eukaryotic cell lines

Policy information about [cell lines](#)

|                                                                      |                                                                                                |
|----------------------------------------------------------------------|------------------------------------------------------------------------------------------------|
| Cell line source(s)                                                  | All cell lines were obtained from the ATCC ( <a href="http://www.atcc.org">www.atcc.org</a> ). |
| Authentication                                                       | All of the cell lines were authenticated.                                                      |
| Mycoplasma contamination                                             | not contaminated.                                                                              |
| Commonly misidentified lines<br>(See <a href="#">ICLAC</a> register) | not applicable.                                                                                |

## Animals and other organisms

Policy information about [studies involving animals](#); [ARRIVE guidelines](#) recommended for reporting animal research

|                         |                                                                                                 |
|-------------------------|-------------------------------------------------------------------------------------------------|
| Laboratory animals      | Adult AB zebrafish, both male and female were used in the study for the xenograft.              |
| Wild animals            | Wild animals are not involved in the study.                                                     |
| Field-collected samples | The study did not involve samples collected from the field.                                     |
| Ethics oversight        | Zebrafish facility at Boston University School of Medicine, following IACUC-approved protocols. |

Note that full information on the approval of the study protocol must also be provided in the manuscript.

## Flow Cytometry

### Plots

Confirm that:

- The axis labels state the marker and fluorochrome used (e.g. CD4-FITC).
- The axis scales are clearly visible. Include numbers along axes only for bottom left plot of group (a 'group' is an analysis of identical markers).
- All plots are contour plots with outliers or pseudocolor plots.
- A numerical value for number of cells or percentage (with statistics) is provided.

### Methodology

|                           |                                                                                                                                                                                                                                                                                                                                  |
|---------------------------|----------------------------------------------------------------------------------------------------------------------------------------------------------------------------------------------------------------------------------------------------------------------------------------------------------------------------------|
| Sample preparation        | Two million cells were fixed with 95% precooled ethanol, incubated overnight at -20 °C, washed with Dulbecco's Phosphate Buffered Saline (DPBS, SH30028LS, Corning), and stained with propidium iodide/RNase staining buffer (BDB550825, BD Biosciences) containing 0.1% sodium citrate for 45 minutes (min) on ice in the dark. |
| Instrument                | Stained cells were analyzed by flow cytometry using BD LSRII SORP (BD Biosciences).                                                                                                                                                                                                                                              |
| Software                  | ModFit LT software (Verify Software House) was used to generate DNA histograms. Each experiment was performed in triplicates.                                                                                                                                                                                                    |
| Cell population abundance | Over 80% of cell population was used to analyze the data.                                                                                                                                                                                                                                                                        |
| Gating strategy           | To avoid the dead and aggregated cells, we gated the live cells and single cells.                                                                                                                                                                                                                                                |

- Tick this box to confirm that a figure exemplifying the gating strategy is provided in the Supplementary Information.
